# Supplementary material
Source: publisher site journal article supplement (https://www.spandidos-publications.com/7011/downloadSupplementary)
Supplement: Supplementary file 1 [file downloadSupplementary]

## Sheet: Sheet1
Table SIV. Clinical information of 1,089 patients with colorectal cancer.
Id	Age	Sex	Stage	T	N	M
TCGA-AA-A00R	64	FEMALE	Stage I	T1	N0	M0
TCGA-AA-3526	57	MALE	Stage I	T1	N0	M0
TCGA-AA-A01Z	68	MALE	Stage II	T1	N0	M0
TCGA-AA-A00A	80	MALE	Stage II	T1	N0	M0
TCGA-NH-A50T	68	FEMALE	Stage II	T1	N0	unknow
TCGA-AY-6197	60	MALE	Stage II	T1	N0	unknow
TCGA-AG-3892	57	FEMALE	Stage I	T2	N0	M0
TCGA-CI-6623	44	MALE	Stage I	T2	N0	M0
TCGA-D5-6898	51	FEMALE	Stage I	T2	N0	M0
TCGA-AA-3538	54	FEMALE	Stage I	T2	N0	M0
TCGA-AA-3553	61	FEMALE	Stage I	T2	N0	M0
TCGA-AA-3866	78	FEMALE	Stage I	T2	N0	M0
TCGA-QG-A5Z2	61	MALE	Stage I	T2	N0	M0
TCGA-AG-3883	69	MALE	Stage I	T2	N0	M0
TCGA-AA-A00D	70	MALE	Stage I	T2	N0	M0
TCGA-AA-3558	70	MALE	Stage I	T2	N0	M0
TCGA-DC-6158	70	MALE	Stage I	T2	N0	M0
TCGA-AA-3850	74	MALE	Stage I	T2	N0	M0
TCGA-G4-6628	78	MALE	Stage I	T2	N0	M0
TCGA-AA-3975	80	MALE	Stage I	T2	N0	M0
TCGA-AA-3543	84	MALE	Stage I	T2	N0	M0
TCGA-G4-6323	50	MALE	Stage I	T2	N0	unknow
TCGA-AA-A01Q	48	FEMALE	Stage II	T2	N0	M0
TCGA-AA-3685	69	MALE	Stage II	T2	N0	M0
TCGA-AA-3697	77	MALE	Stage II	T2	N0	M0
TCGA-AF-2692	54	FEMALE	Stage II	T2	N0	M0
TCGA-AA-A017	57	FEMALE	Stage II	T2	N0	M0
TCGA-F4-6805	58	FEMALE	Stage II	T2	N0	M0
TCGA-AG-A01J	59	FEMALE	Stage II	T2	N0	M0
TCGA-AA-3984	61	FEMALE	Stage II	T2	N0	M0
TCGA-F5-6571	62	FEMALE	Stage II	T2	N0	M0
TCGA-CM-5349	68	FEMALE	Stage II	T2	N0	M0
TCGA-DM-A28E	72	FEMALE	Stage II	T2	N0	M0
TCGA-G4-6586	73	FEMALE	Stage II	T2	N0	M0
TCGA-AA-3534	78	FEMALE	Stage II	T2	N0	M0
TCGA-AA-3950	79	FEMALE	Stage II	T2	N0	M0
TCGA-DM-A1D0	79	FEMALE	Stage II	T2	N0	M0
TCGA-AA-3966	89	FEMALE	Stage II	T2	N0	M0
TCGA-A6-2670	45	MALE	Stage II	T2	N0	M0
TCGA-D5-6541	49	MALE	Stage II	T2	N0	M0
TCGA-F5-6814	57	MALE	Stage II	T2	N0	M0
TCGA-A6-3810	62	MALE	Stage II	T2	N0	M0
TCGA-AA-A00E	65	MALE	Stage II	T2	N0	M0
TCGA-AG-3894	65	MALE	Stage II	T2	N0	M0
TCGA-AA-3841	66	MALE	Stage II	T2	N0	M0
TCGA-AA-3831	66	MALE	Stage II	T2	N0	M0
TCGA-CM-4743	69	MALE	Stage II	T2	N0	M0
TCGA-D5-6932	69	MALE	Stage II	T2	N0	M0
TCGA-A6-3808	73	MALE	Stage II	T2	N0	M0
TCGA-5M-AATE	76	MALE	Stage II	T2	N0	M0
TCGA-AA-A00K	79	MALE	Stage II	T2	N0	M0
TCGA-AA-3939	83	MALE	Stage II	T2	N0	M0
TCGA-DM-A1D6	88	MALE	Stage II	T2	N0	M0
TCGA-EI-6883	63	MALE	Stage II	T2	N0	M0
TCGA-EF-5830	54	MALE	Stage II	T2	N0	M0
TCGA-WS-AB45	52	FEMALE	Stage II	T2	N0	unknow
TCGA-QG-A5YX	61	FEMALE	Stage II	T2	N0	unknow
TCGA-CK-6746	84	FEMALE	Stage II	T2	N0	unknow
TCGA-D5-6533	68	FEMALE	unknow	T2	N0	M0
TCGA-AA-3977	65	MALE	unknow	T2	N0	unknow
TCGA-AZ-4313	51	FEMALE	Stage I	T3	N0	M0
TCGA-AZ-5407	51	FEMALE	Stage I	T3	N0	M0
TCGA-F4-6808	54	FEMALE	Stage I	T3	N0	M0
TCGA-AG-A025	62	FEMALE	Stage I	T3	N0	M0
TCGA-AG-A015	64	FEMALE	Stage I	T3	N0	M0
TCGA-CK-5916	71	FEMALE	Stage I	T3	N0	M0
TCGA-AA-3875	78	FEMALE	Stage I	T3	N0	M0
TCGA-AA-3877	83	FEMALE	Stage I	T3	N0	M0
TCGA-AG-3742	85	FEMALE	Stage I	T3	N0	M0
TCGA-CM-6163	74	MALE	Stage I	T3	N0	M0
TCGA-AA-A00W	80	MALE	Stage I	T3	N0	M0
TCGA-CM-6161	36	FEMALE	Stage I	T3	N0	M0
TCGA-AA-3667	36	FEMALE	Stage I	T3	N0	M0
TCGA-CM-6166	48	FEMALE	Stage I	T3	N0	M0
TCGA-AG-A008	50	FEMALE	Stage I	T3	N0	M0
TCGA-CI-6624	53	FEMALE	Stage I	T3	N0	M0
TCGA-AY-A71X	54	FEMALE	Stage I	T3	N0	M0
TCGA-AA-3968	55	FEMALE	Stage I	T3	N0	M0
TCGA-F4-6806	59	FEMALE	Stage I	T3	N0	M0
TCGA-3L-AA1B	61	FEMALE	Stage I	T3	N0	M0
TCGA-AA-A03J	65	FEMALE	Stage I	T3	N0	M0
TCGA-AG-3882	66	FEMALE	Stage I	T3	N0	M0
TCGA-AG-3891	66	FEMALE	Stage I	T3	N0	M0
TCGA-AU-6004	69	FEMALE	Stage I	T3	N0	M0
TCGA-CM-6170	73	FEMALE	Stage I	T3	N0	M0
TCGA-AA-A02W	73	FEMALE	Stage I	T3	N0	M0
TCGA-AY-A54L	74	FEMALE	Stage I	T3	N0	M0
TCGA-A6-2684	75	FEMALE	Stage I	T3	N0	M0
TCGA-CM-6171	77	FEMALE	Stage I	T3	N0	M0
TCGA-D5-7000	79	FEMALE	Stage I	T3	N0	M0
TCGA-AD-6548	81	FEMALE	Stage I	T3	N0	M0
TCGA-AA-3514	81	FEMALE	Stage I	T3	N0	M0
TCGA-AA-3821	81	FEMALE	Stage I	T3	N0	M0
TCGA-AG-3896	85	FEMALE	Stage I	T3	N0	M0
TCGA-AA-3980	89	FEMALE	Stage I	T3	N0	M0
TCGA-AG-A002	35	MALE	Stage I	T3	N0	M0
TCGA-D5-6530	53	MALE	Stage I	T3	N0	M0
TCGA-D5-6923	57	MALE	Stage I	T3	N0	M0
TCGA-AA-A01V	59	MALE	Stage I	T3	N0	M0
TCGA-F4-6569	60	MALE	Stage I	T3	N0	M0
TCGA-CM-5864	60	MALE	Stage I	T3	N0	M0
TCGA-A6-6138	61	MALE	Stage I	T3	N0	M0
TCGA-AG-3890	62	MALE	Stage I	T3	N0	M0
TCGA-AG-3878	64	MALE	Stage I	T3	N0	M0
TCGA-AG-3587	65	MALE	Stage I	T3	N0	M0
TCGA-D5-6540	66	MALE	Stage I	T3	N0	M0
TCGA-AA-3544	68	MALE	Stage I	T3	N0	M0
TCGA-CM-4744	69	MALE	Stage I	T3	N0	M0
TCGA-AA-3549	69	MALE	Stage I	T3	N0	M0
TCGA-AA-3855	72	MALE	Stage I	T3	N0	M0
TCGA-AA-3502	73	MALE	Stage I	T3	N0	M0
TCGA-AA-A02Y	73	MALE	Stage I	T3	N0	M0
TCGA-AA-3986	73	MALE	Stage I	T3	N0	M0
TCGA-A6-5656	74	MALE	Stage I	T3	N0	M0
TCGA-AA-A01I	76	MALE	Stage I	T3	N0	M0
TCGA-AG-A02X	77	MALE	Stage I	T3	N0	M0
TCGA-AA-3506	77	MALE	Stage I	T3	N0	M0
TCGA-AA-3556	78	MALE	Stage I	T3	N0	M0
TCGA-AA-3495	79	MALE	Stage I	T3	N0	M0
TCGA-AA-3530	80	MALE	Stage I	T3	N0	M0
TCGA-A6-5659	82	MALE	Stage I	T3	N0	M0
TCGA-A6-6653	82	MALE	Stage I	T3	N0	M0
TCGA-AG-4009	83	MALE	Stage I	T3	N0	M0
TCGA-AG-A014	86	MALE	Stage I	T3	N0	M0
TCGA-QL-A97D	84	FEMALE	Stage I	T3	N0	unknow
TCGA-CK-6751	88	FEMALE	Stage I	T3	N0	unknow
TCGA-CK-5915	63	MALE	Stage I	T3	N0	unknow
TCGA-AD-5900	67	MALE	Stage I	T3	N0	unknow
TCGA-AZ-6599	72	MALE	Stage I	T3	N0	unknow
TCGA-CK-5912	81	MALE	Stage I	T3	N0	unknow
TCGA-AY-4071	63	FEMALE	Stage I	T3	N0	unknow
TCGA-AG-A01Y	49	FEMALE	Stage II	T3	N0	M0
TCGA-AA-3673	53	FEMALE	Stage II	T3	N0	M0
TCGA-AA-3509	54	FEMALE	Stage II	T3	N0	M0
TCGA-AG-4022	59	FEMALE	Stage II	T3	N0	M0
TCGA-AG-A01W	67	FEMALE	Stage II	T3	N0	M0
TCGA-A6-2680	72	FEMALE	Stage II	T3	N0	M0
TCGA-AA-3664	74	FEMALE	Stage II	T3	N0	M0
TCGA-AA-3520	86	FEMALE	Stage II	T3	N0	M0
TCGA-AG-3574	89	FEMALE	Stage II	T3	N0	M0
TCGA-AA-3492	90	FEMALE	Stage II	T3	N0	M0
TCGA-AA-3663	42	MALE	Stage II	T3	N0	M0
TCGA-AG-3575	51	MALE	Stage II	T3	N0	M0
TCGA-DT-5265	51	MALE	Stage II	T3	N0	M0
TCGA-AG-A02N	67	MALE	Stage II	T3	N0	M0
TCGA-AA-A029	67	MALE	Stage II	T3	N0	M0
TCGA-AZ-6601	68	MALE	Stage II	T3	N0	M0
TCGA-AA-3655	68	MALE	Stage II	T3	N0	M0
TCGA-AA-3510	70	MALE	Stage II	T3	N0	M0
TCGA-AA-3864	71	MALE	Stage II	T3	N0	M0
TCGA-AA-3489	75	MALE	Stage II	T3	N0	M0
TCGA-AA-3715	77	MALE	Stage II	T3	N0	M0
TCGA-AA-A024	81	MALE	Stage II	T3	N0	M0
TCGA-AA-A02O	82	MALE	Stage II	T3	N0	M0
TCGA-AA-3675	84	MALE	Stage II	T3	N0	M0
TCGA-AA-3521	87	MALE	Stage II	T3	N0	M0
TCGA-AA-3819	41	FEMALE	Stage II	T3	N0	M0
TCGA-CA-5254	42	FEMALE	Stage II	T3	N0	M0
TCGA-CM-6164	46	FEMALE	Stage II	T3	N0	M0
TCGA-A6-2685	48	FEMALE	Stage II	T3	N0	M0
TCGA-AY-A69D	55	FEMALE	Stage II	T3	N0	M0
TCGA-DY-A1DE	56	FEMALE	Stage II	T3	N0	M0
TCGA-G4-6588	58	FEMALE	Stage II	T3	N0	M0
TCGA-EI-6514	59	FEMALE	Stage II	T3	N0	M0
TCGA-DM-A282	60	FEMALE	Stage II	T3	N0	M0
TCGA-AA-3554	62	FEMALE	Stage II	T3	N0	M0
TCGA-D5-6534	62	FEMALE	Stage II	T3	N0	M0
TCGA-AA-3833	63	FEMALE	Stage II	T3	N0	M0
TCGA-AA-3815	65	FEMALE	Stage II	T3	N0	M0
TCGA-AM-5821	68	FEMALE	Stage II	T3	N0	M0
TCGA-A6-6650	69	FEMALE	Stage II	T3	N0	M0
TCGA-DM-A280	70	FEMALE	Stage II	T3	N0	M0
TCGA-F4-6855	70	FEMALE	Stage II	T3	N0	M0
TCGA-DM-A0X9	71	FEMALE	Stage II	T3	N0	M0
TCGA-CM-6677	75	FEMALE	Stage II	T3	N0	M0
TCGA-AA-3531	75	FEMALE	Stage II	T3	N0	M0
TCGA-D5-6920	77	FEMALE	Stage II	T3	N0	M0
TCGA-G4-6625	77	FEMALE	Stage II	T3	N0	M0
TCGA-EI-6506	78	FEMALE	Stage II	T3	N0	M0
TCGA-F4-6570	78	FEMALE	Stage II	T3	N0	M0
TCGA-AA-3818	78	FEMALE	Stage II	T3	N0	M0
TCGA-AG-3608	79	FEMALE	Stage II	T3	N0	M0
TCGA-AZ-4681	79	FEMALE	Stage II	T3	N0	M0
TCGA-CK-4951	79	FEMALE	Stage II	T3	N0	M0
TCGA-AA-3710	80	FEMALE	Stage II	T3	N0	M0
TCGA-AU-3779	80	FEMALE	Stage II	T3	N0	M0
TCGA-AA-3518	81	FEMALE	Stage II	T3	N0	M0
TCGA-A6-2686	81	FEMALE	Stage II	T3	N0	M0
TCGA-AA-3555	81	FEMALE	Stage II	T3	N0	M0
TCGA-AA-3812	82	FEMALE	Stage II	T3	N0	M0
TCGA-CM-6168	84	FEMALE	Stage II	T3	N0	M0
TCGA-A6-5665	84	FEMALE	Stage II	T3	N0	M0
TCGA-AA-A02R	84	FEMALE	Stage II	T3	N0	M0
TCGA-AA-3814	85	FEMALE	Stage II	T3	N0	M0
TCGA-AG-4015	85	FEMALE	Stage II	T3	N0	M0
TCGA-AA-3845	86	FEMALE	Stage II	T3	N0	M0
TCGA-G4-6302	90	FEMALE	Stage II	T3	N0	M0
TCGA-AA-3527	90	FEMALE	Stage II	T3	N0	M0
TCGA-A6-6141	31	MALE	Stage II	T3	N0	M0
TCGA-D5-6927	34	MALE	Stage II	T3	N0	M0
TCGA-CM-6674	39	MALE	Stage II	T3	N0	M0
TCGA-CM-5860	44	MALE	Stage II	T3	N0	M0
TCGA-CA-5255	45	MALE	Stage II	T3	N0	M0
TCGA-CA-6718	46	MALE	Stage II	T3	N0	M0
TCGA-F4-6463	51	MALE	Stage II	T3	N0	M0
TCGA-CA-6717	57	MALE	Stage II	T3	N0	M0
TCGA-CM-6679	58	MALE	Stage II	T3	N0	M0
TCGA-CM-4752	58	MALE	Stage II	T3	N0	M0
TCGA-EI-6507	60	MALE	Stage II	T3	N0	M0
TCGA-AA-3517	60	MALE	Stage II	T3	N0	M0
TCGA-D5-6532	61	MALE	Stage II	T3	N0	M0
TCGA-AG-3898	61	MALE	Stage II	T3	N0	M0
TCGA-A6-6140	62	MALE	Stage II	T3	N0	M0
TCGA-AG-4008	63	MALE	Stage II	T3	N0	M0
TCGA-AA-3532	63	MALE	Stage II	T3	N0	M0
TCGA-DM-A28M	63	MALE	Stage II	T3	N0	M0
TCGA-AA-A01G	63	MALE	Stage II	T3	N0	M0
TCGA-F4-6703	64	MALE	Stage II	T3	N0	M0
TCGA-AA-3970	65	MALE	Stage II	T3	N0	M0
TCGA-DM-A0XD	65	MALE	Stage II	T3	N0	M0
TCGA-CA-6716	65	MALE	Stage II	T3	N0	M0
TCGA-CM-6169	67	MALE	Stage II	T3	N0	M0
TCGA-AA-3522	67	MALE	Stage II	T3	N0	M0
TCGA-D5-6930	67	MALE	Stage II	T3	N0	M0
TCGA-D5-6924	68	MALE	Stage II	T3	N0	M0
TCGA-AG-3887	68	MALE	Stage II	T3	N0	M0
TCGA-DM-A1DB	68	MALE	Stage II	T3	N0	M0
TCGA-AG-A00Y	68	MALE	Stage II	T3	N0	M0
TCGA-AA-A00Z	70	MALE	Stage II	T3	N0	M0
TCGA-AA-3861	72	MALE	Stage II	T3	N0	M0
TCGA-AA-3561	72	MALE	Stage II	T3	N0	M0
TCGA-EF-5831	72	MALE	Stage II	T3	N0	M0
TCGA-D5-5540	73	MALE	Stage II	T3	N0	M0
TCGA-CM-6165	74	MALE	Stage II	T3	N0	M0
TCGA-DM-A28C	74	MALE	Stage II	T3	N0	M0
TCGA-D5-6531	75	MALE	Stage II	T3	N0	M0
TCGA-DM-A28K	75	MALE	Stage II	T3	N0	M0
TCGA-DM-A28G	75	MALE	Stage II	T3	N0	M0
TCGA-AG-A00H	75	MALE	Stage II	T3	N0	M0
TCGA-AA-A004	76	MALE	Stage II	T3	N0	M0
TCGA-AD-6889	76	MALE	Stage II	T3	N0	M0
TCGA-CA-6719	77	MALE	Stage II	T3	N0	M0
TCGA-A6-4105	79	MALE	Stage II	T3	N0	M0
TCGA-AG-A011	80	MALE	Stage II	T3	N0	M0
TCGA-D5-6928	80	MALE	Stage II	T3	N0	M0
TCGA-DM-A1D4	80	MALE	Stage II	T3	N0	M0
TCGA-AA-3862	82	MALE	Stage II	T3	N0	M0
TCGA-DM-A1D7	82	MALE	Stage II	T3	N0	M0
TCGA-AA-3979	84	MALE	Stage II	T3	N0	M0
TCGA-G4-6627	84	MALE	Stage II	T3	N0	M0
TCGA-AA-3852	88	MALE	Stage II	T3	N0	M0
TCGA-G4-6626	90	MALE	Stage II	T3	N0	M0
TCGA-AA-A022	88	FEMALE	Stage II	T3	N0	M0
TCGA-AG-A026	66	MALE	Stage II	T3	N0	M0
TCGA-AA-A010	46	FEMALE	Stage II	T3	N0	M0
TCGA-G4-6304	66	FEMALE	Stage II	T3	N0	M0
TCGA-A6-3809	71	FEMALE	Stage II	T3	N0	M0
TCGA-A6-2676	75	FEMALE	Stage II	T3	N0	M0
TCGA-CI-6622	74	MALE	Stage II	T3	N0	M0
TCGA-AA-A00N	75	MALE	Stage II	T3	N0	M0
TCGA-SS-A7HO	44	FEMALE	Stage II	T3	N0	M0
TCGA-A6-5666	78	MALE	Stage II	T3	N0	M0
TCGA-AZ-6598	77	FEMALE	Stage II	T3	N0	unknow
TCGA-AZ-5403	43	MALE	Stage II	T3	N0	unknow
TCGA-4T-AA8H	42	FEMALE	Stage II	T3	N0	unknow
TCGA-NH-A8F7	53	FEMALE	Stage II	T3	N0	unknow
TCGA-CK-5913	58	FEMALE	Stage II	T3	N0	unknow
TCGA-CK-6747	87	FEMALE	Stage II	T3	N0	unknow
TCGA-CL-5918	90	FEMALE	Stage II	T3	N0	unknow
TCGA-NH-A5IV	90	FEMALE	Stage II	T3	N0	unknow
TCGA-A6-6780	74	MALE	Stage II	T3	N0	unknow
TCGA-A6-6782	82	MALE	Stage II	T3	N0	unknow
TCGA-A6-2679	73	FEMALE	Stage II	T3	N0	unknow
TCGA-AG-A01N	68	FEMALE	Stage IV	T3	N0	M1
TCGA-AA-A02J	70	FEMALE	Stage IV	T3	N0	M1
TCGA-AA-3494	55	MALE	Stage IV	T3	N0	M1
TCGA-AA-3713	68	MALE	Stage IV	T3	N0	M1
TCGA-A6-6652	59	MALE	Stage IV	T3	N0	M1
TCGA-A6-2683	57	FEMALE	Stage IV	T3	N0	M1
TCGA-NH-A50U	42	MALE	Stage IV	T3	N0	M1
TCGA-5M-AAT4	74	MALE	Stage IV	T3	N0	M1
TCGA-G4-6306	71	MALE	unknow	T3	N0	M0
TCGA-D5-6539	45	FEMALE	unknow	T3	N0	M0
TCGA-EI-6510	77	FEMALE	unknow	T3	N0	unknow
TCGA-AD-6963	58	MALE	unknow	T3	N0	unknow
TCGA-AD-6901	78	MALE	unknow	T3	N0	unknow
TCGA-CM-6676	82	MALE	Stage I	T4	N0	M0
TCGA-AA-3496	83	FEMALE	Stage II	T4	N0	M0
TCGA-CA-5796	52	FEMALE	Stage II	T4	N0	M0
TCGA-F5-6861	60	FEMALE	Stage II	T4	N0	M0
TCGA-DM-A1D9	67	FEMALE	Stage II	T4	N0	M0
TCGA-AA-3846	74	FEMALE	Stage II	T4	N0	M0
TCGA-A6-5661	80	FEMALE	Stage II	T4	N0	M0
TCGA-CA-5797	56	MALE	Stage II	T4	N0	M0
TCGA-EI-6882	59	MALE	Stage II	T4	N0	M0
TCGA-AZ-4315	61	MALE	Stage II	T4	N0	M0
TCGA-AA-3837	67	MALE	Stage II	T4	N0	M0
TCGA-D5-6529	69	MALE	Stage II	T4	N0	M0
TCGA-D5-6536	73	MALE	Stage II	T4	N0	M0
TCGA-AA-3851	74	MALE	Stage II	T4	N0	M0
TCGA-T9-A92H	82	MALE	Stage II	T4	N0	M0
TCGA-AA-3947	60	FEMALE	Stage II	T4	N0	M0
TCGA-A6-2675	78	MALE	Stage II	T4	N0	unknow
TCGA-AD-6890	65	MALE	unknow	T4	N0	unknow
TCGA-AG-3726	63	FEMALE	Stage I	T4	N0	M0
TCGA-AA-3858	67	MALE	Stage I	T4	N0	M0
TCGA-AD-A5EK	51	MALE	Stage I	T4	N0	unknow
TCGA-AA-3660	51	FEMALE	Stage II	T4	N0	M0
TCGA-G4-6295	70	FEMALE	Stage II	T4	N0	M0
TCGA-AA-3524	85	MALE	Stage II	T4	N0	M0
TCGA-CA-5256	54	FEMALE	Stage II	T4	N0	M0
TCGA-CM-5861	63	FEMALE	Stage II	T4	N0	M0
TCGA-F4-6854	77	FEMALE	Stage II	T4	N0	M0
TCGA-AA-3956	65	MALE	Stage II	T4	N0	M0
TCGA-AA-3511	64	MALE	Stage II	T4	N0	M0
TCGA-A6-6648	56	MALE	Stage IV	T4	N0	M1
TCGA-AA-3854	71	FEMALE	Stage I	T4	N0	M0
TCGA-F4-6856	45	MALE	Stage I	T4	N0	M0
TCGA-CM-4746	61	MALE	Stage I	T4	N0	M0
TCGA-A6-2681	73	FEMALE	Stage II	T4	N0	M0
TCGA-AA-3856	59	MALE	Stage II	T4	N0	M0
TCGA-AA-A00L	66	MALE	Stage II	T4	N0	M0
TCGA-AD-A5EJ	74	FEMALE	Stage II	T4	N0	unknow
TCGA-AA-3860	53	FEMALE	Stage III	T1	N1	M0
TCGA-EI-6512	64	FEMALE	Stage III	T1	N1	M0
TCGA-BM-6198	73	MALE	Stage III	T1	N1	unknow
TCGA-D5-6929	49	FEMALE	Stage IV	T1	N1	M1
TCGA-AA-A01X	80	FEMALE	Stage III	T2	N1	M0
TCGA-DY-A1H8	77	FEMALE	Stage III	T2	N1	M0
TCGA-AA-A01S	47	FEMALE	Stage III	T2	N1	M0
TCGA-AA-A01P	80	FEMALE	Stage III	T2	N1	M0
TCGA-EI-6881	60	MALE	Stage III	T2	N1	M0
TCGA-EI-6884	71	MALE	Stage III	T2	N1	M0
TCGA-A6-2678	43	FEMALE	Stage III	T2	N1	M0
TCGA-AG-3885	71	FEMALE	Stage III	T2	N1	M0
TCGA-AA-A00U	50	MALE	Stage III	T2	N1	M0
TCGA-EI-6511	52	MALE	Stage III	T2	N1	M0
TCGA-A6-A56B	57	MALE	Stage III	T2	N1	M0
TCGA-CA-6715	63	MALE	Stage III	T2	N1	M0
TCGA-DM-A1HB	75	MALE	Stage III	T2	N1	M0
TCGA-AA-3982	75	MALE	Stage III	T2	N1	M0
TCGA-AZ-4615	84	MALE	Stage III	T2	N1	M0
TCGA-F5-6863	71	FEMALE	Stage III	T2	N1	M0
TCGA-G4-6321	60	FEMALE	Stage III	T2	N1	unknow
TCGA-G4-6320	73	MALE	Stage III	T2	N1	unknow
TCGA-CK-6748	45	FEMALE	Stage IV	T2	N1	M1
TCGA-AG-3582	75	MALE	Stage IV	T2	N1	M1
TCGA-CI-6620	41	FEMALE	Stage IV	T2	N1	M1
TCGA-AA-3678	60	FEMALE	Stage III	T3	N1	M0
TCGA-AZ-6608	55	FEMALE	Stage III	T3	N1	M0
TCGA-AA-3842	51	MALE	Stage III	T3	N1	M0
TCGA-AA-A01C	75	MALE	Stage III	T3	N1	M0
TCGA-G4-6293	49	FEMALE	Stage III	T3	N1	M0
TCGA-AG-A020	57	FEMALE	Stage III	T3	N1	M0
TCGA-AA-A01T	63	FEMALE	Stage III	T3	N1	M0
TCGA-AA-3681	77	FEMALE	Stage III	T3	N1	M0
TCGA-AA-3672	90	FEMALE	Stage III	T3	N1	M0
TCGA-AA-3519	63	MALE	Stage III	T3	N1	M0
TCGA-AA-3666	68	MALE	Stage III	T3	N1	M0
TCGA-EI-6917	33	MALE	Stage III	T3	N1	M0
TCGA-D5-5539	60	MALE	Stage III	T3	N1	M0
TCGA-D5-6922	76	MALE	Stage III	T3	N1	M0
TCGA-G4-6307	37	FEMALE	Stage III	T3	N1	M0
TCGA-G4-6309	40	FEMALE	Stage III	T3	N1	M0
TCGA-AZ-4308	47	FEMALE	Stage III	T3	N1	M0
TCGA-AG-A00C	49	FEMALE	Stage III	T3	N1	M0
TCGA-F4-6460	51	FEMALE	Stage III	T3	N1	M0
TCGA-AG-3612	55	FEMALE	Stage III	T3	N1	M0
TCGA-A6-6654	65	FEMALE	Stage III	T3	N1	M0
TCGA-CK-4950	68	FEMALE	Stage III	T3	N1	M0
TCGA-A6-2672	82	FEMALE	Stage III	T3	N1	M0
TCGA-AA-3949	87	FEMALE	Stage III	T3	N1	M0
TCGA-EI-6513	59	MALE	Stage III	T3	N1	M0
TCGA-A6-A5ZU	59	MALE	Stage III	T3	N1	M0
TCGA-A6-5657	65	MALE	Stage III	T3	N1	M0
TCGA-AG-A032	68	MALE	Stage III	T3	N1	M0
TCGA-AA-3994	69	MALE	Stage III	T3	N1	M0
TCGA-G4-6310	69	MALE	Stage III	T3	N1	M0
TCGA-AA-A01F	72	MALE	Stage III	T3	N1	M0
TCGA-AG-3728	73	MALE	Stage III	T3	N1	M0
TCGA-AA-3967	77	MALE	Stage III	T3	N1	M0
TCGA-AA-3525	90	MALE	Stage III	T3	N1	M0
TCGA-CK-4947	46	FEMALE	Stage III	T3	N1	M0
TCGA-A6-A566	55	FEMALE	Stage III	T3	N1	M0
TCGA-AA-A00Q	66	FEMALE	Stage III	T3	N1	M0
TCGA-AZ-6605	77	MALE	Stage III	T3	N1	M0
TCGA-AA-A00J	80	MALE	Stage III	T3	N1	M0
TCGA-D5-6926	65	MALE	Stage III	T3	N1	M0
TCGA-G4-6311	80	MALE	Stage III	T3	N1	unknow
TCGA-D5-6535	80	FEMALE	Stage III	T3	N1	unknow
TCGA-CI-6621	63	MALE	Stage III	T3	N1	unknow
TCGA-CK-5914	81	MALE	Stage III	T3	N1	unknow
TCGA-G4-6298	90	MALE	Stage III	T3	N1	unknow
TCGA-G4-6303	54	FEMALE	Stage IV	T3	N1	M1
TCGA-AA-A02F	68	FEMALE	Stage IV	T3	N1	M1
TCGA-AA-3696	75	FEMALE	Stage IV	T3	N1	M1
TCGA-AA-A02E	82	FEMALE	Stage IV	T3	N1	M1
TCGA-A6-A567	56	MALE	Stage IV	T3	N1	M1
TCGA-AG-3731	65	MALE	Stage IV	T3	N1	M1
TCGA-AA-3972	72	MALE	Stage IV	T3	N1	M1
TCGA-G4-6294	75	MALE	Stage IV	T3	N1	M1
TCGA-AA-3688	80	MALE	Stage IV	T3	N1	M1
TCGA-F4-6809	52	FEMALE	Stage IV	T3	N1	M1
TCGA-DY-A1DG	75	MALE	Stage IV	T3	N1	M1
TCGA-AA-3693	77	FEMALE	Stage IV	T3	N1	M1
TCGA-AZ-6600	64	MALE	Stage IV	T3	N1	M1
TCGA-AA-3973	69	MALE	Stage IV	T3	N1	M1
TCGA-AZ-4614	71	FEMALE	Stage IV	T3	N1	M1
TCGA-A6-2682	70	MALE	Stage IV	T3	N1	M1
TCGA-CL-4957	79	FEMALE	unknow	T3	N1	M0
TCGA-AZ-6603	77	FEMALE	unknow	T3	N1	unknow
TCGA-DM-A1D8	50	FEMALE	unknow	T3	N1	unknow
TCGA-AA-3971	58	MALE	Stage III	T4	N1	M0
TCGA-DM-A28F	73	MALE	Stage III	T4	N1	M0
TCGA-G4-6322	65	MALE	Stage III	T4	N1	unknow
TCGA-CK-4948	45	FEMALE	Stage III	T4	N1	M0
TCGA-AG-A01L	58	MALE	Stage III	T4	N1	M0
TCGA-AG-A02G	66	MALE	Stage IV	T4	N1	M1
TCGA-G4-6315	66	MALE	Stage IV	T4	N1	M1
TCGA-CM-5341	82	FEMALE	Stage III	T1	N1	M0
TCGA-AY-6386	66	FEMALE	Stage III	T2	N1	M0
TCGA-A6-5667	40	FEMALE	Stage III	T2	N1	unknow
TCGA-A6-6142	56	FEMALE	Stage IV	T2	N1	M1
TCGA-CM-5862	80	MALE	Stage IV	T2	N1	M1
TCGA-EI-6508	48	FEMALE	Stage III	T3	N1	M0
TCGA-CM-6162	48	FEMALE	Stage III	T3	N1	M0
TCGA-DC-5869	62	FEMALE	Stage III	T3	N1	M0
TCGA-CM-6172	70	FEMALE	Stage III	T3	N1	M0
TCGA-D5-5541	63	MALE	Stage III	T3	N1	M0
TCGA-CM-5348	72	MALE	Stage III	T3	N1	M0
TCGA-AD-6895	84	MALE	Stage III	T3	N1	M0
TCGA-CM-4748	53	MALE	Stage III	T3	N1	M0
TCGA-QG-A5YV	64	FEMALE	Stage III	T3	N1	unknow
TCGA-AY-5543	65	FEMALE	Stage IV	T3	N1	M1
TCGA-CM-5868	59	FEMALE	Stage IV	T3	N1	M1
TCGA-D5-6537	64	MALE	Stage III	T4	N1	unknow
TCGA-EI-6885	57	FEMALE	Stage IV	T1	N1	M1
TCGA-4N-A93T	67	MALE	Stage III	T2	N1	M0
TCGA-CM-5344	39	FEMALE	Stage III	T3	N1	M0
TCGA-A6-4107	57	FEMALE	Stage III	T3	N1	M0
TCGA-CM-5863	60	FEMALE	Stage III	T3	N1	M0
TCGA-D5-5538	60	FEMALE	Stage III	T3	N1	M0
TCGA-CM-4751	62	MALE	Stage III	T3	N1	M0
TCGA-A6-6649	66	MALE	Stage III	T3	N1	M0
TCGA-A6-6651	55	FEMALE	Stage III	T3	N1	unknow
TCGA-A6-6781	43	MALE	Stage III	T3	N1	unknow
TCGA-AA-3941	84	FEMALE	Stage IV	T3	N1	M1
TCGA-CM-4747	47	MALE	Stage IV	T3	N1	M1
TCGA-AD-6888	73	MALE	Stage III	T4	N1	M0
TCGA-NH-A6GC	66	FEMALE	Stage IV	T4	N1	M1
TCGA-CI-6619	41	MALE	Stage IV	T2	N1	M1
TCGA-A6-6137	55	MALE	Stage III	T3	N1	M0
TCGA-CM-6678	63	FEMALE	Stage IV	T1	N1	M1
TCGA-AA-A00F	66	MALE	Stage III	T1	N2	M0
TCGA-F4-6807	51	FEMALE	Stage III	T1	N2	M0
TCGA-AG-A036	71	MALE	Stage III	T2	N2	M0
TCGA-DM-A0XF	68	FEMALE	Stage III	T2	N2	M0
TCGA-AA-3844	78	FEMALE	Stage III	T2	N2	M0
TCGA-AA-3952	68	MALE	Stage III	T2	N2	M0
TCGA-AA-3562	82	MALE	Stage III	T2	N2	M0
TCGA-CK-4952	48	FEMALE	Stage III	T2	N2	M0
TCGA-CM-6167	57	FEMALE	Stage III	T2	N2	M0
TCGA-A6-5660	73	MALE	Stage III	T2	N2	M0
TCGA-RU-A8FL	51	MALE	Stage III	T2	N2	unknow
TCGA-G4-6317	51	FEMALE	Stage III	T2	N2	unknow
TCGA-NH-A6GB	71	FEMALE	Stage III	T2	N2	unknow
TCGA-AG-4005	64	MALE	Stage IV	T2	N2	M1
TCGA-AA-3989	84	MALE	Stage IV	T2	N2	M1
TCGA-AA-A02K	50	MALE	Stage IV	T2	N2	M1
TCGA-NH-A8F8	79	MALE	Stage IV	T2	N2	M1
TCGA-AA-3516	74	FEMALE	Stage III	T3	N2	M0
TCGA-AA-3811	84	FEMALE	Stage III	T3	N2	M0
TCGA-AA-A03F	90	FEMALE	Stage III	T3	N2	M0
TCGA-AA-A01R	47	MALE	Stage III	T3	N2	M0
TCGA-AA-3712	65	MALE	Stage III	T3	N2	M0
TCGA-D5-6538	79	FEMALE	Stage III	T3	N2	M0
TCGA-AY-4070	50	FEMALE	Stage III	T3	N2	M0
TCGA-A6-3807	53	FEMALE	Stage III	T3	N2	M0
TCGA-A6-2677	68	FEMALE	Stage III	T3	N2	M0
TCGA-AA-3548	71	FEMALE	Stage III	T3	N2	M0
TCGA-DM-A1DA	71	FEMALE	Stage III	T3	N2	M0
TCGA-AA-3560	72	FEMALE	Stage III	T3	N2	M0
TCGA-AA-A01K	74	FEMALE	Stage III	T3	N2	M0
TCGA-AF-2690	76	FEMALE	Stage III	T3	N2	M0
TCGA-AA-3529	78	FEMALE	Stage III	T3	N2	M0
TCGA-AA-3848	82	FEMALE	Stage III	T3	N2	M0
TCGA-AA-A00O	83	FEMALE	Stage III	T3	N2	M0
TCGA-G4-6299	69	MALE	Stage III	T3	N2	M0
TCGA-DM-A28A	78	MALE	Stage III	T3	N2	M0
TCGA-DM-A1HA	82	MALE	Stage III	T3	N2	M0
TCGA-F4-6461	41	FEMALE	Stage III	T3	N2	M0
TCGA-D5-6931	77	MALE	Stage III	T3	N2	M0
TCGA-AA-3955	38	MALE	Stage III	T3	N2	M0
TCGA-F4-6459	61	FEMALE	Stage III	T3	N2	M0
TCGA-F5-6864	74	FEMALE	Stage III	T3	N2	M0
TCGA-NH-A50V	69	MALE	Stage III	T3	N2	M0
TCGA-EI-6509	53	MALE	Stage III	T3	N2	M0
TCGA-AD-6965	62	MALE	Stage III	T3	N2	M0
TCGA-A6-A565	34	FEMALE	Stage III	T3	N2	unknow
TCGA-AF-3911	48	MALE	Stage III	T3	N2	unknow
TCGA-NH-A6GA	58	MALE	Stage III	T3	N2	unknow
TCGA-QG-A5YW	55	FEMALE	Stage III	T3	N2	unknow
TCGA-AD-6899	84	MALE	Stage III	T3	N2	unknow
TCGA-AY-6196	47	MALE	Stage III	T3	N2	unknow
TCGA-AA-3692	47	FEMALE	Stage IV	T3	N2	M1
TCGA-AA-3695	63	FEMALE	Stage IV	T3	N2	M1
TCGA-DM-A285	71	FEMALE	Stage IV	T3	N2	M1
TCGA-AA-3870	71	FEMALE	Stage IV	T3	N2	M1
TCGA-G4-6314	76	FEMALE	Stage IV	T3	N2	M1
TCGA-AZ-4616	82	FEMALE	Stage IV	T3	N2	M1
TCGA-AG-4021	84	FEMALE	Stage IV	T3	N2	M1
TCGA-AA-3679	59	MALE	Stage IV	T3	N2	M1
TCGA-AG-3584	60	MALE	Stage IV	T3	N2	M1
TCGA-AA-3930	66	MALE	Stage IV	T3	N2	M1
TCGA-A6-2674	71	MALE	Stage IV	T3	N2	M1
TCGA-A6-2671	85	MALE	Stage IV	T3	N2	M1
TCGA-AG-A023	62	FEMALE	Stage IV	T3	N2	M1
TCGA-AA-3684	65	FEMALE	Stage IV	T3	N2	M1
TCGA-AZ-4323	37	MALE	Stage IV	T3	N2	M1
TCGA-AZ-6607	69	MALE	Stage IV	T3	N2	M1
TCGA-AA-3869	76	MALE	Stage IV	T3	N2	M1
TCGA-AZ-6606	81	MALE	Stage IV	T3	N2	M1
TCGA-AG-4007	87	MALE	Stage IV	T3	N2	M1
TCGA-AM-5820	59	FEMALE	Stage IV	T3	N2	M1
TCGA-AY-A8YK	44	MALE	Stage IV	T3	N2	M1
TCGA-5M-AAT6	40	FEMALE	Stage IV	T3	N2	M1
TCGA-CM-6675	35	MALE	Stage IV	T3	N2	M1
TCGA-AF-4110	77	MALE	Stage IV	T3	N2	unknow
TCGA-G5-6233	74	MALE	unknow	T3	N2	M0
TCGA-D5-5537	83	MALE	unknow	T3	N2	unknow
TCGA-AD-6964	58	MALE	unknow	T3	N2	unknow
TCGA-DM-A28H	50	MALE	Stage III	T4	N2	M0
TCGA-AA-3552	85	MALE	Stage III	T4	N2	M0
TCGA-CM-6680	78	FEMALE	Stage III	T4	N2	M0
TCGA-F4-6704	60	MALE	Stage III	T4	N2	unknow
TCGA-AA-A02H	74	FEMALE	Stage IV	T4	N2	M1
TCGA-A6-5662	46	MALE	Stage IV	T4	N2	M1
TCGA-AA-3680	67	FEMALE	Stage IV	T4	N2	M1
TCGA-AA-3662	80	FEMALE	Stage IV	T4	N2	M1
TCGA-DM-A288	68	MALE	Stage III	T4	N2	M0
TCGA-AA-3542	69	MALE	Stage III	T4	N2	M0
TCGA-AG-A016	55	MALE	Stage IV	T4	N2	M1
TCGA-EI-7002	58	MALE	Stage IV	T4	N2	M1
TCGA-AA-3867	74	MALE	Stage IV	T4	N2	M1
TCGA-AA-3872	45	MALE	Stage IV	T4	N2	M1
TCGA-A6-5664	80	MALE	Stage III	T4	N2	unknow
TCGA-G4-6297	55	FEMALE	Stage IV	T4	N2	M1
TCGA-AH-6549	66	MALE	unknow	T1	unknow	unknow
GSM972244	51	FEMALE	Stage I	T1	N0	M0
GSM972237	55	FEMALE	Stage I	T1	N0	M0
GSM972315	60	FEMALE	Stage I	T1	N0	M0
GSM972508	69	FEMALE	Stage I	T1	N0	M0
GSM972249	74	FEMALE	Stage I	T1	N0	M0
GSM971969	30.2	MALE	Stage I	T1	N0	M0
GSM972281	64	MALE	Stage I	T1	N0	M0
GSM972297	77	MALE	Stage I	T1	N0	M0
GSM972236	71	MALE	Stage IV	T1	N0	M1
GSM972411	48	FEMALE	Stage III	T1	N1	M0
GSM972374	65	MALE	Stage III	T1	N1	M0
GSM971970	31.7	FEMALE	Stage I	T2	N0	M0
GSM971960	38.2	FEMALE	Stage I	T2	N0	M0
GSM972494	43	FEMALE	Stage I	T2	N0	M0
GSM972496	65	FEMALE	Stage I	T2	N0	M0
GSM972290	70	FEMALE	Stage I	T2	N0	M0
GSM971978	71.4	FEMALE	Stage I	T2	N0	M0
GSM972278	72	FEMALE	Stage I	T2	N0	M0
GSM972471	73	FEMALE	Stage I	T2	N0	M0
GSM972509	73	FEMALE	Stage I	T2	N0	M0
GSM972464	76	FEMALE	Stage I	T2	N0	M0
GSM972282	79	FEMALE	Stage I	T2	N0	M0
GSM972303	80	FEMALE	Stage I	T2	N0	M0
GSM972313	83	FEMALE	Stage I	T2	N0	M0
GSM971972	40.2	MALE	Stage I	T2	N0	M0
GSM972454	62	MALE	Stage I	T2	N0	M0
GSM972242	69	MALE	Stage I	T2	N0	M0
GSM972469	69	MALE	Stage I	T2	N0	M0
GSM972492	69	MALE	Stage I	T2	N0	M0
GSM972269	70	MALE	Stage I	T2	N0	M0
GSM971989	71.3	MALE	Stage I	T2	N0	M0
GSM972462	72	MALE	Stage I	T2	N0	M0
GSM972335	73	MALE	Stage I	T2	N0	M0
GSM972342	78	MALE	Stage I	T2	N0	M0
GSM971990	83.1	MALE	Stage I	T2	N0	M0
GSM972053	55	MALE	Stage II	T2	N0	M0
GSM972052	68	MALE	Stage II	T2	N0	M0
GSM972285	71	MALE	Stage II	T2	N0	M0
GSM972129	76	MALE	Stage II	T2	N0	M0
GSM972238	53	FEMALE	Stage III	T2	N1	M0
GSM972235	57	FEMALE	Stage III	T2	N1	M0
GSM972096	63	FEMALE	Stage III	T2	N1	M0
GSM972379	63	FEMALE	Stage III	T2	N1	M0
GSM972497	77	FEMALE	Stage III	T2	N1	M0
GSM972514	79	FEMALE	Stage III	T2	N1	M0
GSM972263	32	MALE	Stage III	T2	N1	M0
GSM972320	64	MALE	Stage III	T2	N1	M0
GSM972268	67	MALE	Stage III	T2	N1	M0
GSM972001	71.5	MALE	Stage III	T2	N1	M0
GSM972013	89.4	FEMALE	Stage IV	T2	N1	M1
GSM971964	35.4	FEMALE	Stage III	T2	N2	M0
GSM972170	67	FEMALE	Stage III	T2	N2	M0
GSM972018	68	FEMALE	Stage III	T2	N2	M0
GSM972024	62	MALE	Stage III	T2	N2	M0
GSM972105	53	MALE	Stage III	T2	N3	M0
GSM972166	42	FEMALE	Stage III	T3	unknow	M0
GSM972133	64	MALE	Stage III	T3	unknow	M0
GSM972164	70	MALE	Stage III	T3	unknow	M0
GSM972210	50	MALE	Stage IV	T3	unknow	M1
GSM971965	37.5	FEMALE	Stage II	T3	N0	M0
GSM971975	41.9	FEMALE	Stage II	T3	N0	M0
GSM972503	42	FEMALE	Stage II	T3	N0	M0
GSM972430	43	FEMALE	Stage II	T3	N0	M0
GSM972124	49	FEMALE	Stage II	T3	N0	M0
GSM972414	52	FEMALE	Stage II	T3	N0	M0
GSM972358	53	FEMALE	Stage II	T3	N0	M0
GSM972522	53	FEMALE	Stage II	T3	N0	M0
GSM972195	54	FEMALE	Stage II	T3	N0	M0
GSM972359	56	FEMALE	Stage II	T3	N0	M0
GSM972077	58	FEMALE	Stage II	T3	N0	M0
GSM972304	60	FEMALE	Stage II	T3	N0	M0
GSM972292	62	FEMALE	Stage II	T3	N0	M0
GSM972144	63	FEMALE	Stage II	T3	N0	M0
GSM972032	64	FEMALE	Stage II	T3	N0	M0
GSM972125	64	FEMALE	Stage II	T3	N0	M0
GSM972083	65	FEMALE	Stage II	T3	N0	M0
GSM972127	66	FEMALE	Stage II	T3	N0	M0
GSM972406	66	FEMALE	Stage II	T3	N0	M0
GSM971979	66.4	FEMALE	Stage II	T3	N0	M0
GSM972094	67	FEMALE	Stage II	T3	N0	M0
GSM972071	68	FEMALE	Stage II	T3	N0	M0
GSM972081	68	FEMALE	Stage II	T3	N0	M0
GSM972089	68	FEMALE	Stage II	T3	N0	M0
GSM972410	68	FEMALE	Stage II	T3	N0	M0
GSM972475	68	FEMALE	Stage II	T3	N0	M0
GSM972196	69	FEMALE	Stage II	T3	N0	M0
GSM972222	69	FEMALE	Stage II	T3	N0	M0
GSM972344	70	FEMALE	Stage II	T3	N0	M0
GSM972383	70	FEMALE	Stage II	T3	N0	M0
GSM972403	70	FEMALE	Stage II	T3	N0	M0
GSM972460	70	FEMALE	Stage II	T3	N0	M0
GSM972307	71	FEMALE	Stage II	T3	N0	M0
GSM972319	71	FEMALE	Stage II	T3	N0	M0
GSM972326	71	FEMALE	Stage II	T3	N0	M0
GSM972090	72	FEMALE	Stage II	T3	N0	M0
GSM972192	72	FEMALE	Stage II	T3	N0	M0
GSM972332	72	FEMALE	Stage II	T3	N0	M0
GSM972515	72	FEMALE	Stage II	T3	N0	M0
GSM972084	73	FEMALE	Stage II	T3	N0	M0
GSM972347	73	FEMALE	Stage II	T3	N0	M0
GSM972356	73	FEMALE	Stage II	T3	N0	M0
GSM972448	74	FEMALE	Stage II	T3	N0	M0
GSM972500	74	FEMALE	Stage II	T3	N0	M0
GSM972016	74.5	FEMALE	Stage II	T3	N0	M0
GSM972050	75	FEMALE	Stage II	T3	N0	M0
GSM972058	75	FEMALE	Stage II	T3	N0	M0
GSM972221	75	FEMALE	Stage II	T3	N0	M0
GSM972388	75	FEMALE	Stage II	T3	N0	M0
GSM972059	76	FEMALE	Stage II	T3	N0	M0
GSM972092	76	FEMALE	Stage II	T3	N0	M0
GSM972316	77	FEMALE	Stage II	T3	N0	M0
GSM972386	77	FEMALE	Stage II	T3	N0	M0
GSM972489	77	FEMALE	Stage II	T3	N0	M0
GSM972131	78	FEMALE	Stage II	T3	N0	M0
GSM972135	78	FEMALE	Stage II	T3	N0	M0
GSM972197	78	FEMALE	Stage II	T3	N0	M0
GSM972330	79	FEMALE	Stage II	T3	N0	M0
GSM972073	80	FEMALE	Stage II	T3	N0	M0
GSM972483	80	FEMALE	Stage II	T3	N0	M0
GSM972229	81	FEMALE	Stage II	T3	N0	M0
GSM972255	81	FEMALE	Stage II	T3	N0	M0
GSM972456	82	FEMALE	Stage II	T3	N0	M0
GSM972067	83	FEMALE	Stage II	T3	N0	M0
GSM972298	83	FEMALE	Stage II	T3	N0	M0
GSM972397	83	FEMALE	Stage II	T3	N0	M0
GSM972087	84	FEMALE	Stage II	T3	N0	M0
GSM972318	84	FEMALE	Stage II	T3	N0	M0
GSM972132	87	FEMALE	Stage II	T3	N0	M0
GSM972357	88	FEMALE	Stage II	T3	N0	M0
GSM972517	88	FEMALE	Stage II	T3	N0	M0
GSM972493	89	FEMALE	Stage II	T3	N0	M0
GSM972482	90	FEMALE	Stage II	T3	N0	M0
GSM972521	90	FEMALE	Stage II	T3	N0	M0
GSM972161	91	FEMALE	Stage II	T3	N0	M0
GSM972015	92.4	FEMALE	Stage II	T3	N0	M0
GSM972047	93	FEMALE	Stage II	T3	N0	M0
GSM972035	94	FEMALE	Stage II	T3	N0	M0
GSM972286	24	MALE	Stage II	T3	N0	M0
GSM971973	24.9	MALE	Stage II	T3	N0	M0
GSM971967	42.6	MALE	Stage II	T3	N0	M0
GSM972079	44	MALE	Stage II	T3	N0	M0
GSM972264	46	MALE	Stage II	T3	N0	M0
GSM972322	46	MALE	Stage II	T3	N0	M0
GSM972167	47	MALE	Stage II	T3	N0	M0
GSM972065	48	MALE	Stage II	T3	N0	M0
GSM972076	48	MALE	Stage II	T3	N0	M0
GSM972333	49	MALE	Stage II	T3	N0	M0
GSM972426	49	MALE	Stage II	T3	N0	M0
GSM972443	49	MALE	Stage II	T3	N0	M0
GSM972095	50	MALE	Stage II	T3	N0	M0
GSM972440	50	MALE	Stage II	T3	N0	M0
GSM972470	50	MALE	Stage II	T3	N0	M0
GSM972225	51	MALE	Stage II	T3	N0	M0
GSM972123	53	MALE	Stage II	T3	N0	M0
GSM972046	54	MALE	Stage II	T3	N0	M0
GSM972063	54	MALE	Stage II	T3	N0	M0
GSM972311	55	MALE	Stage II	T3	N0	M0
GSM972085	56	MALE	Stage II	T3	N0	M0
GSM972461	56	MALE	Stage II	T3	N0	M0
GSM972248	58	MALE	Stage II	T3	N0	M0
GSM972382	58	MALE	Stage II	T3	N0	M0
GSM972519	58	MALE	Stage II	T3	N0	M0
GSM972239	59	MALE	Stage II	T3	N0	M0
GSM972417	59	MALE	Stage II	T3	N0	M0
GSM972327	60	MALE	Stage II	T3	N0	M0
GSM972348	60	MALE	Stage II	T3	N0	M0
GSM972038	61	MALE	Stage II	T3	N0	M0
GSM972126	61	MALE	Stage II	T3	N0	M0
GSM972200	61	MALE	Stage II	T3	N0	M0
GSM972241	61	MALE	Stage II	T3	N0	M0
GSM972329	61	MALE	Stage II	T3	N0	M0
GSM972384	61	MALE	Stage II	T3	N0	M0
GSM972187	62	MALE	Stage II	T3	N0	M0
GSM972387	62	MALE	Stage II	T3	N0	M0
GSM972078	63	MALE	Stage II	T3	N0	M0
GSM972381	63	MALE	Stage II	T3	N0	M0
GSM972427	63	MALE	Stage II	T3	N0	M0
GSM972128	64	MALE	Stage II	T3	N0	M0
GSM972149	64	MALE	Stage II	T3	N0	M0
GSM972418	64	MALE	Stage II	T3	N0	M0
GSM972283	65	MALE	Stage II	T3	N0	M0
GSM972398	65	MALE	Stage II	T3	N0	M0
GSM972458	65	MALE	Stage II	T3	N0	M0
GSM972488	65	MALE	Stage II	T3	N0	M0
GSM972060	66	MALE	Stage II	T3	N0	M0
GSM972243	66	MALE	Stage II	T3	N0	M0
GSM972408	66	MALE	Stage II	T3	N0	M0
GSM971986	66.3	MALE	Stage II	T3	N0	M0
GSM971987	66.7	MALE	Stage II	T3	N0	M0
GSM972091	67	MALE	Stage II	T3	N0	M0
GSM972233	67	MALE	Stage II	T3	N0	M0
GSM972473	67	MALE	Stage II	T3	N0	M0
GSM972490	67	MALE	Stage II	T3	N0	M0
GSM971993	67.5	MALE	Stage II	T3	N0	M0
GSM972069	68	MALE	Stage II	T3	N0	M0
GSM972137	68	MALE	Stage II	T3	N0	M0
GSM972190	68	MALE	Stage II	T3	N0	M0
GSM972228	68	MALE	Stage II	T3	N0	M0
GSM972391	68	MALE	Stage II	T3	N0	M0
GSM972404	68	MALE	Stage II	T3	N0	M0
GSM972484	68	MALE	Stage II	T3	N0	M0
GSM972506	68	MALE	Stage II	T3	N0	M0
GSM972338	69	MALE	Stage II	T3	N0	M0
GSM972401	69	MALE	Stage II	T3	N0	M0
GSM972485	69	MALE	Stage II	T3	N0	M0
GSM972502	69	MALE	Stage II	T3	N0	M0
GSM972505	69	MALE	Stage II	T3	N0	M0
GSM972057	70	MALE	Stage II	T3	N0	M0
GSM972306	70	MALE	Stage II	T3	N0	M0
GSM972385	70	MALE	Stage II	T3	N0	M0
GSM972424	70	MALE	Stage II	T3	N0	M0
GSM972153	71	MALE	Stage II	T3	N0	M0
GSM972312	71	MALE	Stage II	T3	N0	M0
GSM972447	71	MALE	Stage II	T3	N0	M0
GSM971991	71.3	MALE	Stage II	T3	N0	M0
GSM972324	72	MALE	Stage II	T3	N0	M0
GSM972355	72	MALE	Stage II	T3	N0	M0
GSM972396	72	MALE	Stage II	T3	N0	M0
GSM972160	73	MALE	Stage II	T3	N0	M0
GSM972465	73	MALE	Stage II	T3	N0	M0
GSM972468	73	MALE	Stage II	T3	N0	M0
GSM972294	74	MALE	Stage II	T3	N0	M0
GSM972491	74	MALE	Stage II	T3	N0	M0
GSM972082	75	MALE	Stage II	T3	N0	M0
GSM972340	75	MALE	Stage II	T3	N0	M0
GSM972477	75	MALE	Stage II	T3	N0	M0
GSM972393	76	MALE	Stage II	T3	N0	M0
GSM972034	77	MALE	Stage II	T3	N0	M0
GSM972138	77	MALE	Stage II	T3	N0	M0
GSM972287	77	MALE	Stage II	T3	N0	M0
GSM972041	78	MALE	Stage II	T3	N0	M0
GSM972223	78	MALE	Stage II	T3	N0	M0
GSM972309	78	MALE	Stage II	T3	N0	M0
GSM972480	78	MALE	Stage II	T3	N0	M0
GSM971963	78.2	MALE	Stage II	T3	N0	M0
GSM972049	79	MALE	Stage II	T3	N0	M0
GSM972147	79	MALE	Stage II	T3	N0	M0
GSM972331	79	MALE	Stage II	T3	N0	M0
GSM972450	80	MALE	Stage II	T3	N0	M0
GSM972459	80	MALE	Stage II	T3	N0	M0
GSM972478	80	MALE	Stage II	T3	N0	M0
GSM971994	80.9	MALE	Stage II	T3	N0	M0
GSM972031	81	MALE	Stage II	T3	N0	M0
GSM972040	81	MALE	Stage II	T3	N0	M0
GSM972086	81	MALE	Stage II	T3	N0	M0
GSM971981	81.8	MALE	Stage II	T3	N0	M0
GSM972054	82	MALE	Stage II	T3	N0	M0
GSM972267	82	MALE	Stage II	T3	N0	M0
GSM972516	82	MALE	Stage II	T3	N0	M0
GSM972042	83	MALE	Stage II	T3	N0	M0
GSM972487	84	MALE	Stage II	T3	N0	M0
GSM972317	85	MALE	Stage II	T3	N0	M0
GSM972343	86	MALE	Stage II	T3	N0	M0
GSM972486	87	MALE	Stage II	T3	N0	M0
GSM972510	89	MALE	Stage II	T3	N0	M0
GSM972402	71	MALE	Stage II	T3	N0	M1
GSM972051	34	FEMALE	Stage IV	T3	N0	M1
GSM972006	67.5	FEMALE	Stage IV	T3	N0	M1
GSM972213	71	FEMALE	Stage IV	T3	N0	M1
GSM972254	77	FEMALE	Stage IV	T3	N0	M1
GSM972043	56	MALE	Stage IV	T3	N0	M1
GSM972014	65.8	MALE	Stage IV	T3	N0	M1
GSM972045	71	MALE	Stage IV	T3	N0	M1
GSM971966	40.5	FEMALE	Stage III	T3	N1	M0
GSM972375	46	FEMALE	Stage III	T3	N1	M0
GSM972474	49	FEMALE	Stage III	T3	N1	M0
GSM972498	50	FEMALE	Stage III	T3	N1	M0
GSM972193	51	FEMALE	Stage III	T3	N1	M0
GSM972453	51	FEMALE	Stage III	T3	N1	M0
GSM972198	52	FEMALE	Stage III	T3	N1	M0
GSM972360	54	FEMALE	Stage III	T3	N1	M0
GSM972150	55	FEMALE	Stage III	T3	N1	M0
GSM972202	57	FEMALE	Stage III	T3	N1	M0
GSM972023	59	FEMALE	Stage III	T3	N1	M0
GSM972377	59	FEMALE	Stage III	T3	N1	M0
GSM971996	63	FEMALE	Stage III	T3	N1	M0
GSM972113	63	FEMALE	Stage III	T3	N1	M0
GSM972279	67	FEMALE	Stage III	T3	N1	M0
GSM972323	67	FEMALE	Stage III	T3	N1	M0
GSM972363	68	FEMALE	Stage III	T3	N1	M0
GSM972139	69	FEMALE	Stage III	T3	N1	M0
GSM972495	69	FEMALE	Stage III	T3	N1	M0
GSM972152	70	FEMALE	Stage III	T3	N1	M0
GSM972368	70	FEMALE	Stage III	T3	N1	M0
GSM972364	71	FEMALE	Stage III	T3	N1	M0
GSM972425	72	FEMALE	Stage III	T3	N1	M0
GSM972162	73	FEMALE	Stage III	T3	N1	M0
GSM972370	73	FEMALE	Stage III	T3	N1	M0
GSM972466	73	FEMALE	Stage III	T3	N1	M0
GSM972457	74	FEMALE	Stage III	T3	N1	M0
GSM972151	75	FEMALE	Stage III	T3	N1	M0
GSM972501	76	FEMALE	Stage III	T3	N1	M0
GSM972117	78	FEMALE	Stage III	T3	N1	M0
GSM972265	78	FEMALE	Stage III	T3	N1	M0
GSM972308	79	FEMALE	Stage III	T3	N1	M0
GSM972310	80	FEMALE	Stage III	T3	N1	M0
GSM972337	80	FEMALE	Stage III	T3	N1	M0
GSM972346	82	FEMALE	Stage III	T3	N1	M0
GSM972175	83	FEMALE	Stage III	T3	N1	M0
GSM972507	83	FEMALE	Stage III	T3	N1	M0
GSM972350	84	FEMALE	Stage III	T3	N1	M0
GSM972314	86	FEMALE	Stage III	T3	N1	M0
GSM972341	89	FEMALE	Stage III	T3	N1	M0
GSM972455	89	FEMALE	Stage III	T3	N1	M0
GSM972246	92	FEMALE	Stage III	T3	N1	M0
GSM972106	96	FEMALE	Stage III	T3	N1	M0
GSM972120	96	FEMALE	Stage III	T3	N1	M0
GSM972102	22	MALE	Stage III	T3	N1	M0
GSM972371	47	MALE	Stage III	T3	N1	M0
GSM972191	49	MALE	Stage III	T3	N1	M0
GSM972362	50	MALE	Stage III	T3	N1	M0
GSM972250	52	MALE	Stage III	T3	N1	M0
GSM972136	54	MALE	Stage III	T3	N1	M0
GSM972230	55	MALE	Stage III	T3	N1	M0
GSM972325	55	MALE	Stage III	T3	N1	M0
GSM972101	56	MALE	Stage III	T3	N1	M0
GSM972157	57	MALE	Stage III	T3	N1	M0
GSM972148	59	MALE	Stage III	T3	N1	M0
GSM972431	59	MALE	Stage III	T3	N1	M0
GSM971999	61.5	MALE	Stage III	T3	N1	M0
GSM972336	63	MALE	Stage III	T3	N1	M0
GSM972207	65	MALE	Stage III	T3	N1	M0
GSM972211	65	MALE	Stage III	T3	N1	M0
GSM972373	66	MALE	Stage III	T3	N1	M0
GSM972413	66	MALE	Stage III	T3	N1	M0
GSM972156	67	MALE	Stage III	T3	N1	M0
GSM972159	67	MALE	Stage III	T3	N1	M0
GSM972339	67	MALE	Stage III	T3	N1	M0
GSM972415	69	MALE	Stage III	T3	N1	M0
GSM972367	72	MALE	Stage III	T3	N1	M0
GSM972114	73	MALE	Stage III	T3	N1	M0
GSM971998	74.8	MALE	Stage III	T3	N1	M0
GSM972174	75	MALE	Stage III	T3	N1	M0
GSM971983	75.3	MALE	Stage III	T3	N1	M0
GSM972107	76	MALE	Stage III	T3	N1	M0
GSM972520	76	MALE	Stage III	T3	N1	M0
GSM972099	78	MALE	Stage III	T3	N1	M0
GSM972220	81	MALE	Stage III	T3	N1	M0
GSM972394	81	MALE	Stage III	T3	N1	M0
GSM972513	85	MALE	Stage III	T3	N1	M0
GSM972390	87	MALE	Stage III	T3	N1	M0
GSM972109	96	MALE	Stage III	T3	N1	M0
GSM972121	96	MALE	Stage III	T3	N1	M0
GSM972252	37	FEMALE	Stage IV	T3	N1	M1
GSM971961	39.2	FEMALE	Stage IV	T3	N1	M1
GSM972272	47	FEMALE	Stage IV	T3	N1	M1
GSM972212	54	FEMALE	Stage IV	T3	N1	M1
GSM972004	62.9	FEMALE	Stage IV	T3	N1	M1
GSM972240	67	FEMALE	Stage IV	T3	N1	M1
GSM972012	86.8	FEMALE	Stage IV	T3	N1	M1
GSM972231	54	MALE	Stage IV	T3	N1	M1
GSM972439	65	MALE	Stage IV	T3	N1	M1
GSM972217	73	MALE	Stage IV	T3	N1	M1
GSM972010	74.5	MALE	Stage IV	T3	N1	M1
GSM972234	79	MALE	Stage IV	T3	N1	M1
GSM972446	67	MALE	Stage III	T3	N1	unknow
GSM972158	45	FEMALE	Stage III	T3	N2	M0
GSM972028	46	FEMALE	Stage III	T3	N2	M0
GSM972020	49	FEMALE	Stage III	T3	N2	M0
GSM972021	58	FEMALE	Stage III	T3	N2	M0
GSM972188	58	FEMALE	Stage III	T3	N2	M0
GSM972365	59	FEMALE	Stage III	T3	N2	M0
GSM972145	63	FEMALE	Stage III	T3	N2	M0
GSM972112	64	FEMALE	Stage III	T3	N2	M0
GSM972380	64	FEMALE	Stage III	T3	N2	M0
GSM972203	66	FEMALE	Stage III	T3	N2	M0
GSM972354	68	FEMALE	Stage III	T3	N2	M0
GSM972027	70	FEMALE	Stage III	T3	N2	M0
GSM972017	73	FEMALE	Stage III	T3	N2	M0
GSM972376	73	FEMALE	Stage III	T3	N2	M0
GSM972452	75	FEMALE	Stage III	T3	N2	M0
GSM972022	76	FEMALE	Stage III	T3	N2	M0
GSM972000	76.4	FEMALE	Stage III	T3	N2	M0
GSM972116	79	FEMALE	Stage III	T3	N2	M0
GSM972334	79	FEMALE	Stage III	T3	N2	M0
GSM972419	85	FEMALE	Stage III	T3	N2	M0
GSM972142	86	FEMALE	Stage III	T3	N2	M0
GSM972155	42	MALE	Stage III	T3	N2	M0
GSM972194	43	MALE	Stage III	T3	N2	M0
GSM972025	49	MALE	Stage III	T3	N2	M0
GSM972366	50	MALE	Stage III	T3	N2	M0
GSM972321	52	MALE	Stage III	T3	N2	M0
GSM972467	54	MALE	Stage III	T3	N2	M0
GSM972141	58	MALE	Stage III	T3	N2	M0
GSM972369	58	MALE	Stage III	T3	N2	M0
GSM972276	59	MALE	Stage III	T3	N2	M0
GSM972146	60	MALE	Stage III	T3	N2	M0
GSM972428	62	MALE	Stage III	T3	N2	M0
GSM972111	63	MALE	Stage III	T3	N2	M0
GSM972118	64	MALE	Stage III	T3	N2	M0
GSM972103	66	MALE	Stage III	T3	N2	M0
GSM972352	66	MALE	Stage III	T3	N2	M0
GSM972481	67	MALE	Stage III	T3	N2	M0
GSM971997	72	MALE	Stage III	T3	N2	M0
GSM972199	73	MALE	Stage III	T3	N2	M0
GSM972134	74	MALE	Stage III	T3	N2	M0
GSM972301	74	MALE	Stage III	T3	N2	M0
GSM972328	74	MALE	Stage III	T3	N2	M0
GSM972026	75	MALE	Stage III	T3	N2	M0
GSM972511	75	MALE	Stage III	T3	N2	M0
GSM972201	78	MALE	Stage III	T3	N2	M0
GSM972378	78	MALE	Stage III	T3	N2	M0
GSM972412	78	MALE	Stage III	T3	N2	M0
GSM972504	80	MALE	Stage III	T3	N2	M0
GSM972345	83	MALE	Stage III	T3	N2	M0
GSM972420	83	MALE	Stage III	T3	N2	M0
GSM971958	36.4	FEMALE	Stage IV	T3	N2	M1
GSM972216	45	FEMALE	Stage IV	T3	N2	M1
GSM972437	48	FEMALE	Stage IV	T3	N2	M1
GSM972442	54	FEMALE	Stage IV	T3	N2	M1
GSM972253	56	FEMALE	Stage IV	T3	N2	M1
GSM972214	88	FEMALE	Stage IV	T3	N2	M1
GSM972209	54	MALE	Stage IV	T3	N2	M1
GSM972219	60	MALE	Stage IV	T3	N2	M1
GSM972227	61	MALE	Stage IV	T3	N2	M1
GSM972003	64.6	MALE	Stage IV	T3	N2	M1
GSM972009	68.1	MALE	Stage IV	T3	N2	M1
GSM972260	70	MALE	Stage IV	T3	N2	M1
GSM972115	59	FEMALE	Stage III	T3	N3	M0
GSM972030	68	FEMALE	Stage III	T3	N3	M0
GSM972104	72	FEMALE	Stage III	T3	N3	M0
GSM972019	54	MALE	Stage III	T3	N3	M0
GSM972189	63	MALE	Stage III	T4	unknow	M0
GSM972168	76	MALE	Stage III	T4	unknow	M0
GSM972055	31	FEMALE	Stage II	T4	N0	M0
GSM972407	42	FEMALE	Stage II	T4	N0	M0
GSM972062	43	FEMALE	Stage II	T4	N0	M0
GSM971968	44.9	FEMALE	Stage II	T4	N0	M0
GSM972033	45	FEMALE	Stage II	T4	N0	M0
GSM971976	45.2	FEMALE	Stage II	T4	N0	M0
GSM972353	46	FEMALE	Stage II	T4	N0	M0
GSM972036	47	FEMALE	Stage II	T4	N0	M0
GSM972093	55	FEMALE	Stage II	T4	N0	M0
GSM972173	59	FEMALE	Stage II	T4	N0	M0
GSM971995	61.8	FEMALE	Stage II	T4	N0	M0
GSM972070	64	FEMALE	Stage II	T4	N0	M0
GSM971984	68	FEMALE	Stage II	T4	N0	M0
GSM972072	70	FEMALE	Stage II	T4	N0	M0
GSM972074	70	FEMALE	Stage II	T4	N0	M0
GSM972405	70	FEMALE	Stage II	T4	N0	M0
GSM972259	72	FEMALE	Stage II	T4	N0	M0
GSM972409	72	FEMALE	Stage II	T4	N0	M0
GSM972088	73	FEMALE	Stage II	T4	N0	M0
GSM972270	75	FEMALE	Stage II	T4	N0	M0
GSM972392	75	FEMALE	Stage II	T4	N0	M0
GSM972258	77	FEMALE	Stage II	T4	N0	M0
GSM972056	78	FEMALE	Stage II	T4	N0	M0
GSM972061	78	FEMALE	Stage II	T4	N0	M0
GSM972280	79	FEMALE	Stage II	T4	N0	M0
GSM972172	88	FEMALE	Stage II	T4	N0	M0
GSM972257	88	FEMALE	Stage II	T4	N0	M0
GSM972277	88	FEMALE	Stage II	T4	N0	M0
GSM971959	36.9	MALE	Stage II	T4	N0	M0
GSM972075	42	MALE	Stage II	T4	N0	M0
GSM972068	44	MALE	Stage II	T4	N0	M0
GSM972445	48	MALE	Stage II	T4	N0	M0
GSM972416	49	MALE	Stage II	T4	N0	M0
GSM972169	50	MALE	Stage II	T4	N0	M0
GSM972182	53	MALE	Stage II	T4	N0	M0
GSM972143	57	MALE	Stage II	T4	N0	M0
GSM972226	57	MALE	Stage II	T4	N0	M0
GSM972044	58	MALE	Stage II	T4	N0	M0
GSM972451	58	MALE	Stage II	T4	N0	M0
GSM972472	58	MALE	Stage II	T4	N0	M0
GSM972080	61	MALE	Stage II	T4	N0	M0
GSM972140	64	MALE	Stage II	T4	N0	M0
GSM972165	67	MALE	Stage II	T4	N0	M0
GSM972163	71	MALE	Stage II	T4	N0	M0
GSM972351	71	MALE	Stage II	T4	N0	M0
GSM972130	76	MALE	Stage II	T4	N0	M0
GSM972275	76	MALE	Stage II	T4	N0	M0
GSM972389	77	MALE	Stage II	T4	N0	M0
GSM972037	78	MALE	Stage II	T4	N0	M0
GSM972247	79	MALE	Stage II	T4	N0	M0
GSM971992	85.6	MALE	Stage II	T4	N0	M0
GSM972048	50	FEMALE	Stage IV	T4	N0	M1
GSM972064	60	MALE	Stage IV	T4	N0	M1
GSM972039	65	MALE	Stage IV	T4	N0	M1
GSM972066	69	MALE	Stage IV	T4	N0	M1
GSM972262	88	FEMALE	Stage II	T4	N0	unknow
GSM971977	40.8	FEMALE	Stage III	T4	N1	M0
GSM972449	51	FEMALE	Stage III	T4	N1	M0
GSM972399	54	FEMALE	Stage III	T4	N1	M0
GSM972171	70	FEMALE	Stage III	T4	N1	M0
GSM972261	79	FEMALE	Stage III	T4	N1	M0
GSM972349	79	FEMALE	Stage III	T4	N1	M0
GSM972518	82	FEMALE	Stage III	T4	N1	M0
GSM972122	97	FEMALE	Stage III	T4	N1	M0
GSM972476	61	MALE	Stage III	T4	N1	M0
GSM972097	64	MALE	Stage III	T4	N1	M0
GSM972108	64	MALE	Stage III	T4	N1	M0
GSM972395	64	MALE	Stage III	T4	N1	M0
GSM972295	68	MALE	Stage III	T4	N1	M0
GSM971980	76.9	MALE	Stage III	T4	N1	M0
GSM972002	77.8	MALE	Stage III	T4	N1	M0
GSM972302	79	MALE	Stage III	T4	N1	M0
GSM972271	92	MALE	Stage III	T4	N1	M0
GSM972119	96	MALE	Stage III	T4	N1	M0
GSM971974	40.7	FEMALE	Stage IV	T4	N1	M1
GSM972256	63	FEMALE	Stage IV	T4	N1	M1
GSM972011	75.3	FEMALE	Stage IV	T4	N1	M1
GSM971988	77.2	FEMALE	Stage IV	T4	N1	M1
GSM972438	44	MALE	Stage IV	T4	N1	M1
GSM972288	53	MALE	Stage IV	T4	N1	M1
GSM972251	57	MALE	Stage IV	T4	N1	M1
GSM972005	66.1	MALE	Stage IV	T4	N1	M1
GSM972289	72	MALE	Stage IV	T4	N1	M1
GSM972245	77	MALE	Stage IV	T4	N1	M1
GSM972154	49	FEMALE	Stage III	T4	N2	M0
GSM972100	71	FEMALE	Stage III	T4	N2	M0
GSM972361	72	FEMALE	Stage III	T4	N2	M0
GSM972215	73	FEMALE	Stage III	T4	N2	M0
GSM972305	82	FEMALE	Stage III	T4	N2	M0
GSM972176	85	FEMALE	Stage III	T4	N2	M0
GSM972274	91	FEMALE	Stage III	T4	N2	M0
GSM972291	46	MALE	Stage III	T4	N2	M0
GSM972029	58	MALE	Stage III	T4	N2	M0
GSM972372	59	MALE	Stage III	T4	N2	M0
GSM971962	60.9	MALE	Stage III	T4	N2	M0
GSM972512	62	MALE	Stage III	T4	N2	M0
GSM972429	64	MALE	Stage III	T4	N2	M0
GSM972098	66	MALE	Stage III	T4	N2	M0
GSM972463	67	MALE	Stage III	T4	N2	M0
GSM972224	74	MALE	Stage III	T4	N2	M0
GSM972110	76	MALE	Stage III	T4	N2	M0
GSM972479	79	MALE	Stage III	T4	N2	M0
GSM971982	79.3	MALE	Stage III	T4	N2	M0
GSM972499	82	MALE	Stage III	T4	N2	M0
GSM971971	34.7	FEMALE	Stage IV	T4	N2	M1
GSM972441	49	FEMALE	Stage IV	T4	N2	M1
GSM972299	54	FEMALE	Stage IV	T4	N2	M1
GSM972284	63	FEMALE	Stage IV	T4	N2	M1
GSM972400	67.8	FEMALE	Stage IV	T4	N2	M1
GSM971957	34.5	MALE	Stage IV	T4	N2	M1
GSM972266	56	MALE	Stage IV	T4	N2	M1
GSM972208	63	MALE	Stage IV	T4	N2	M1
GSM972008	67.3	MALE	Stage IV	T4	N2	M1
GSM972232	69	MALE	Stage IV	T4	N2	M1
GSM972007	71	MALE	Stage IV	T4	N2	M1
GSM972444	73	MALE	Stage III	T4	N2	unknow
GSM972218	75	FEMALE	Stage IV	T4	N3	M1
